# Supplementary material
Source: PubMed Central journal article supplement (PMC8271154)
Supplement: mmc1.pdf [file mmc1.pdf]

## **Supplemental information**

### **ACE2 interaction with cytoplasmic**

### **PDZ protein enhances SARS-CoV-2 invasion**

**Qiangmin Zhang, Julia Gefter, W. Bruce Sneddon, Tatyana Mamonova, and Peter A. Friedman**

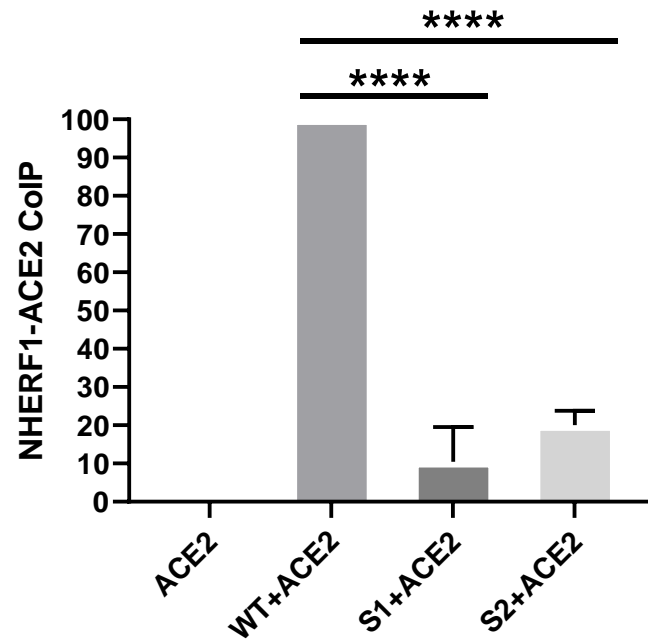

**Figure S1. Quantification analysis of Figure 1D by ImageJ. Related to Figure 1D.** Binding intensity of ACE2 to WT-NHERF1 was set to 100%. Relative binding of S1-NHERF1 or S2-NHERF1 was calculated and plotted using GraphPad 9. Data are means  $\pm$  S.D. (error bars) of n=3 independent experiments (\*\*\*\*,  $p < 0.0001$ ). Similar results were obtained as shown in Figure 1C.

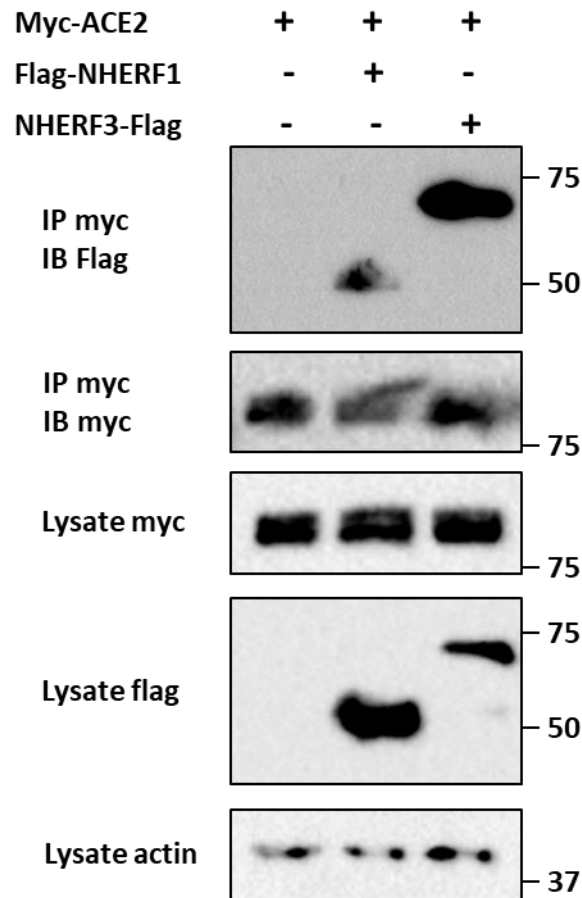

**Figure S2. Coimmunoprecipitation analysis of NHERF3 binding to ACE2. Related to Figure 1B.** Myc-ACE2, myc-ACE2 and Flag-NHERF1, or myc-ACE2 and NHERF3-flag were transfected into HEK293 GnTI<sup>-</sup> cells, respectively. The cell lysates were incubated with anti-Myc agarose beads followed by immunoblot analysis using anti-flag and anti-myc antibodies. Flag-NHERF1 binding to ACE2 was used as a positive control.  $\beta$ -actin served as a loading control. The molecular markers are indicated in kD on the right. Shown are representative blots of 3 independent experiments with similar results.

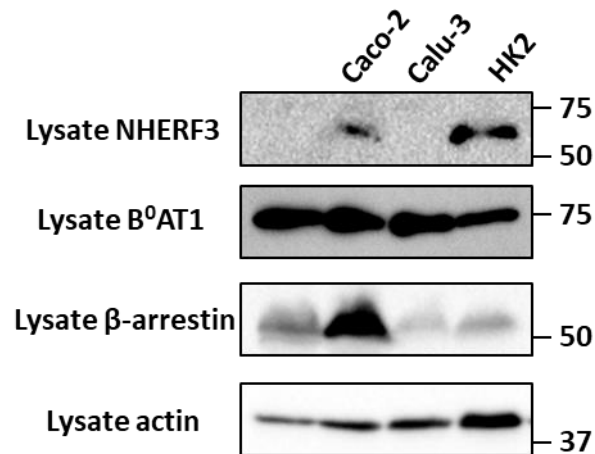

**Figure S3. Expression profiling of endogenous NHERF3, B<sup>0</sup>AT1, and β-arrestin in selected cell lines. Related to Figure 2A.** Cell lysates containing equal amounts of total protein were loaded for immunoblotting analysis using anti-NHERF3, B<sup>0</sup>AT1, β-arrestin and β-actin antibodies. β-actin was used as a loading control. The molecular markers are indicated in kD on the right. Shown are representative blots of 3 independent experiments with similar results.

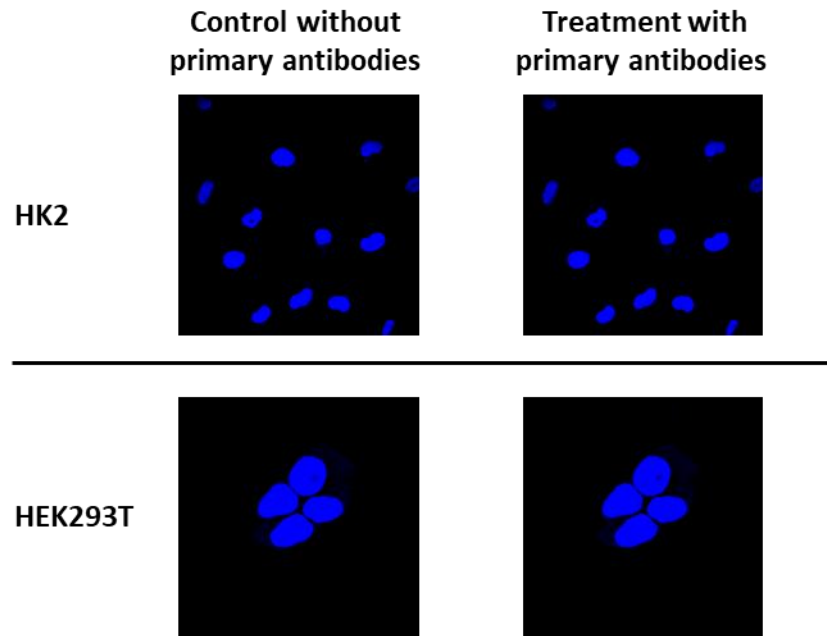

**Figure S4. Proximity ligation assay to detect ACE2-NHERF1 interaction in HK2 or HEK293T cells. Related to Figure 2B.** PLA signals (right) were not detected in either NHERF1-lacking HK2 or in ACE2-deficient HEK293T cells. Images are representative of  $\geq 3$  independent experiments.

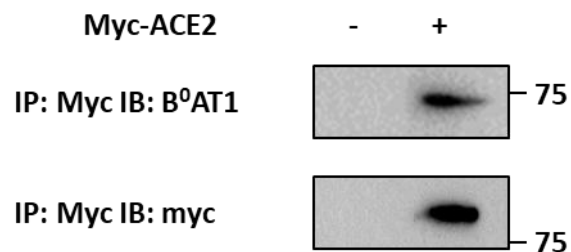

**Figure S5. Endogenous B<sup>0</sup>AT1 coprecipitates with overexpressed myc-ACE2 in HK2 cells Related to Figure 4B.** Myc-ACE2 was transfected into HK2 cells. Untransfected cells were used as a negative control. The resulting cell lysates were incubated with anti-myc agarose beads followed by immunoblotting using anti-myc and anti-B<sup>0</sup>AT1 antibodies. The molecular markers are indicated in kD on the right. Blots are representative of 3 independent experiments.
